# Supplementary material
Source: HighWire-hosted journal article supplement (https://ajnr-sso.highwirestaging.com/highwire/filestream/93827/field_highwire_adjunct_files/0/0603.pdf)

Supplementary Material

Figure 1s: Overview of data from qualitative analysis.

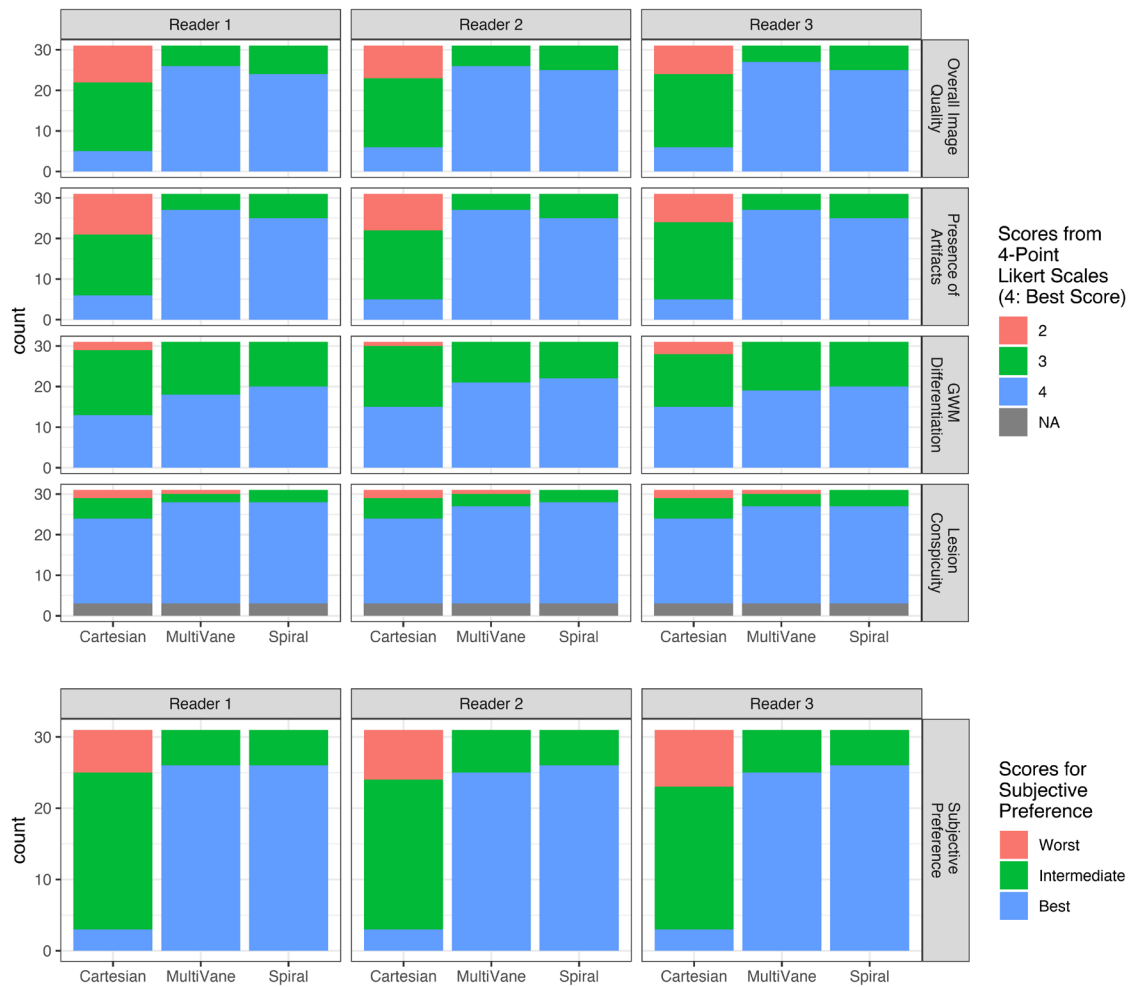

**Figure 2s:** Overview of data from quantitative analysis.

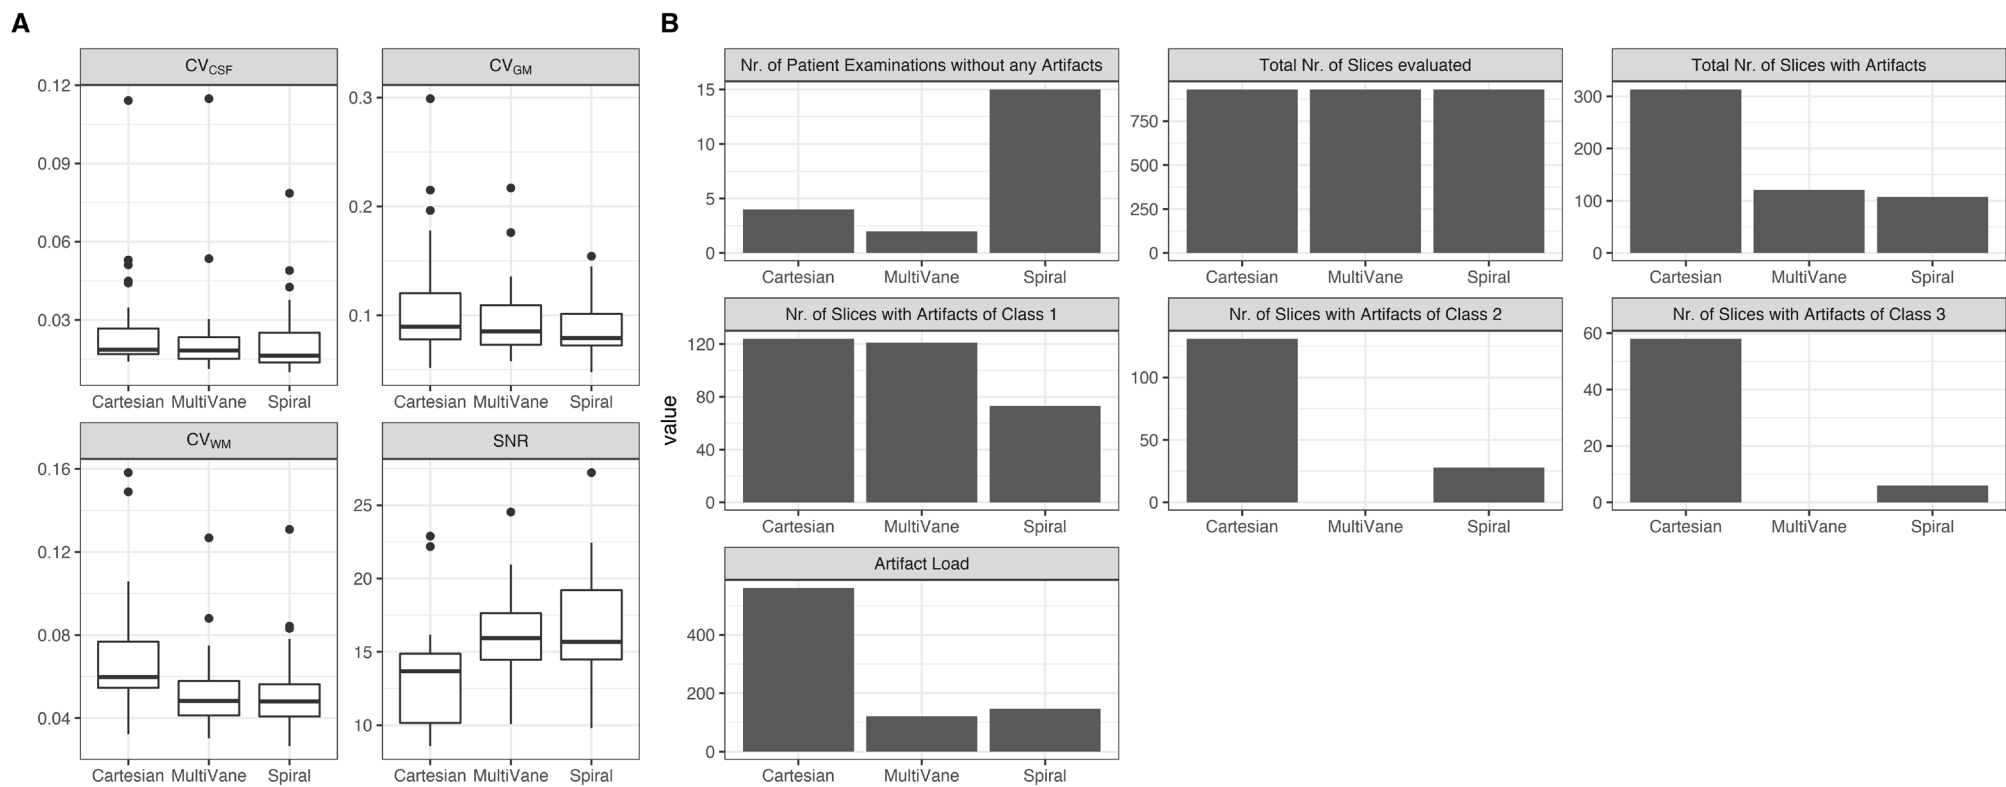

Supplement: 0603.pdf [file 0603.pdf]
